# Supplementary material for: Artificial shading of teinturier grape Kolor clusters reveals light-responsive biomarkers: focus on flavonoid profiles and metabolism
Source: Front Plant Sci. 2024 Mar 12;15:1356799. doi: 10.3389/fpls.2024.1356799 (PMC10963508; doi:10.3389/fpls.2024.1356799)
Supplement: Supplementary file 1 [file Table_1.xlsx]

## Sheet: Supplementary Table 1
Supplementary Table 1 Simple Sequence Repeat identification and comparison results of Kolor.
	VVS2		VVMD5		VVMD7		VVMD25		VVMD27		VVMD28		VVMD32		VrZAG62		VrZAG79
Kolor	149	149	236	236	236	240	247	247	178	184	216	234	269	269	187	193	236	252
VIVC-Kolor*	149	149	236	236	236	240	247	247	178	184	216	234	269	269	187	193	236	252
Reference： Guo, D.-L., Yu, Y.-H., Xi, F.-F., Shi, Y.-Y., and Zhang, G.-H. (2016). Histological and molecular characterization of grape early ripening bud mutant. Int J Genomics 2016, 1–7. doi: 10.1155/2016/5620106. *SSR-marker data came from VIVC website ( https://www.vivc.de/index.php?r=passport%2Fmicrosatbyprof&id=6388).

## Sheet: Supplementary Table 2
Supplementary Table 2 The sampling date for Kolor grape berries from 2018 to 2020.
Year	Development	Vineyard
		Control	Bagging
2018	E-L 33	Jun. 30th	-*
	E-L 35	Jul. 12th	Jul. 25th
	E-L 36	Jul. 21st	Jul. 29th
	E-L 37	Jul. 25th	Aug. 2nd
	E-L 38	Aug. 5th	Aug. 16th
2019	E-L 33	Jun. 13th	-
	E-L 35	Jul. 19th	Jul. 25th
	E-L 36	Jul. 25th	Jul. 31st
	E-L 37	Jul. 31st	Aug. 3rd
	E-L 38	Aug. 17th	Aug. 17th
2020	E-L 33	Jun. 16th	-
	E-L 35	Jul. 15th	Jul. 22nd
	E-L 36	Jul. 22nd	Jul. 28th
	E-L 37	Jul. 28th	Aug. 2nd
	E-L 38	Aug. 15th	Aug. 15th
* During this period, the Kolor berries had not been bagged yet.

## Sheet: Supplementary Table 3
Supplementary Table 3 Primers used for quantification of transcripts by real time quantitative PCR.
Gene	Encoded Protein	Forward primer (5'-3')	Reverse primer (5'-3')	Reference
UBIQUITIN	Ubiquitin	GTGGTATTATTGAGCCATCCTT	AACCTCCAATCCAGTCATCTAC	(Falginella et al., 2012)
CHI-1	Chalcone isomerase	CAGGCAACTCCATTCTTTTC	TTCTCTATCACTGCATTCCC	(Jeong et al., 2004)
CHI-2	Chalcone isomerase	TTTCCTGCAACTTCATGCAC	TGGACAACTCTGTTGCAAGG	(Xie et al., 2019)
F3H-1	Flavanone-3-hydroxylase	CCAATCATAGCAGACTGTCC	TCAGAGGATACACGGTTGCC	(Ageorges et al., 2006)
F3H-2	Flavanone-3-hydroxylase	CTGTGGTGAACTCCGACTGC	CAAATGTTATGGGCTCCTCC	(Falginella et al., 2012)
F3'5'H-1	Flavanone-3'5'-hydroxylase	TCCATGCTTGAGTTGTGCCA	CATGAGCTCCACCACCATGT	(Xie et al., 2019)
F3'5'H-2	Flavanone-3'5'-hydroxylase	AGATGATGGAGGAGCACACG	TGAAGTGTCTGTTCCAGGAGG	(Ju et al., 2023)
F3'5'H-3	Flavanone-3'5'-hydroxylase	CGCTGGCACTAGAATGGGAA	AAGCCACAGGCAAAAATCCC	(Yang et al., 2020)
F3'H	Flavanone-3'-hydroxylase	GAGAATATGCGCGGGGATGA	GCAGGACAGATGAAGCGACT	(Ju et al., 2023)
FLS-1	Flavonol synthase	CAGGGCTTGCAGGTTTTTAG	GGGTCTTCTCCTTGTTCACG	(Badim et al., 2022)
DFR	Dihydroflavonol 4-reductase	AGCGCCTTCTGAAATTTGCTC	AACCACTAGGGACTTCTCATTTACC	(Ju et al., 2023)
LDOX	Leucoanthocyanidin dioxygenase	TATGACCATCTGGCCTAAGA	AGCGATAGCACCGATAGT	(Xie et al., 2019)
UFGT	UDP-glucose-flavonoid-3-O-glucosyltransferase	CGAGCTTGTAGCCCTAGCTG	CACCATTCCGTACCCTCTGG	(Ju et al., 2023)
AAT	Anthocyanin acyltransferase	AGTGAGTCGCGAGGATGTGTTGT	TCCAAGCAGGATTTCCCCAACCA	(Rinaldo et al., 2015)
OMT	O-methyltransferase	CTCTGCAGGCGCCTCTATTA	CCCAAAACAGAGTCTGGACA	(Falginella et al., 2012)
MYBA1	R2R3 Myb-type transcription factor	AAGCCATCATCCACTTCACC	TCACCTCCCTGGATTTGTTC	(Xie et al., 2019)
MYB4a	R2R3 Myb-type transcription factor	TGGAACACCCACATACGGAG	CCTCTTCCTTAACTGCGGCT	(Xie et al., 2019)
MYBF1	R2R3 Myb-type transcription factor	GGAGGTTGAGGGGTTGTG	AAGTTGGGGAAGAGCAGGAG	(Falginella et al., 2012)
HY5	ELONGATED HYPOCOTYL5	GCAAGGGAAAGGAAGAAAGC	CATTTTGCAAGGTGGAGAGC	(Loyola et al., 2016)
HYH	HY5 homolog	AAAACACCATGCTCCGGAAG	TCTTGCCCAACTGATCATGC	(Sun et al., 2020)
MYB5a	R2R3 Myb-type transcription factor	GTGCAGCAGCCATCTAATGTG	GCAGCAGGTTCCCAGACAGT	(Azuma et al., 2012)
MYB5b	R2R3 Myb-type transcription factor	GGTGTTCTTTAATTTGGCTTCA	CACAACAACACAACCACATACA	(Azuma et al., 2012)
Reference： Ageorges, A., Fernandez, L., Vialet, S., Merdinoglu, D., Terrier, N., and Romieu, C. (2006). Four specific isogenes of the anthocyanin metabolic pathway are systematically co-expressed with the red colour of grape berries. Plant Science 170(2), 372-383. doi: 10.1016/j.plantsci.2005.09.007. Azuma, A., Yakushiji, H., Koshita, Y., and Kobayashi, S. (2012). Flavonoid biosynthesis-related g…

## Sheet: Supplementary Table 4
Supplementary Table 4 Meteorological data of the experimental vineyard during the developmental stages of grape berries.
Developmental phases	Flowering			Green			Veraison			Ripening			From flowering to ripening	development period
Year	2018	2019	2020	2018	2019	2020	2018	2019	2020	2018	2019	2020	2018	2019	2020
Growing days (d)	7	9	8	50	47	46	14	13	14	23	18	19	95	90	89
Growing degree days (°C)	92.65	123.6	94.15	833.45	788.2	763.05	257.55	256.8	242.15	447.1	302.9	348	1630.75	1471.5	1447.35
Max temperature (°C)	32.4	36.6	30.3	39.9	38	37.3	35.7	37.7	37.3	37	35.6	37.8	39.9	38	37.8
Min temperature (°C)	15.5	10.2	12.8	13.3	18	13.8	21	23.1	20.9	23.2	18.9	20.9	13.3	10.2	12.8
Average temperature (°C)	23.0857	24.3778	21.7875	26.698	26.6447	26.4022	28.0929	29.4846	27.2143	29.287	26.6333	28.0421	27.2702	26.8322	26.4667
Sunshine duration (h)	26.2	94.4	67.3	364.1	322.7	304.6	61.2	80.1	85.1	141.2	100.2	123.3	592.7	597.4	580.3
Rainfall (mm)	2.4	27.6	25.3	94.6	35.1	126.4	266.5	62.7	26.6	119.5	59.8	100.3	483	185.2	278.6
Relative humidity (%)	62.6714	36.3667	50.325	53.208	54.3702	55.8435	78.65	67.3538	64.2214	71.0826	66.7333	70.7842	62.0755	57.0057	59.9471

## Sheet: Supplementary Table 5
Supplementary Table 5 The concentrations of anthocyaidins in the Kolor skin and pulp in five develomental stages from 2018 to 2020.
Compounds (mg/kg FW)	Year	E-L 33	E-L 35		E-L 36		E-L 37		E-L 38		E-L 33	E-L 35		E-L 36		E-L 37		E-L 38
		S-C*	S-C	S-B	S-C	S-B	S-C	S-B	S-C	S-B	P-C	P-C	P-B	P-C	P-B	P-C	P-B	P-C	P-B
Delphinidin-3-O-glucoside	2018	0.01±0.00	0.1±0.01a	0.24±0.12a	1.20±0.48a	0.75±0.05a	5.97±1.25a	2.94±0.56b	13.86±6.49a	3.83±0.83a	0.03±0.01	0.44±0.09a	0.03±0.00b	0.47±0.25a	0.09±0.02a	1.59±0.44a	0.42±0.05b	1.38±0.16a	0.42±0.07b
	2019	0.04±0.00	0.17±0.08a	0.05±0.01a	0.90±0.24a	0.56±0.10a	5.69±0.12a	4.84±0.64a	15.15±0.57a	5.12±1.17b	0.03±0.00	0.25±0.07a	0.02±0.00b	0.22±0.07a	0.25±0.39a	1.36±0.25a	0.13±0.01b	1.79±0.18a	0.17±0.05b
	2020	0.03±0.00	0.07±0.05a	0.16±0.18a	0.80±0.35b	2.16±0.60a	8.70±2.23a	5.18±0.57a	8.36±3.90a	6.51±2.98a	0.01±0.01	0.02±0.00a	0.02±0.01a	0.10±0.05a	0.07±0.02a	0.20±0.05a	0.14±0.02a	0.27±0.05a	0.37±0.16a
Cyanidin-3-O-glucoside	2018	0.03±0.00	0.10±0.01b	0.37±0.03a	1.25±0.18a	1.03±0.16a	5.59±1.01a	1.70±0.18b	6.41±2.89a	2.28±0.40a	0.05±0.01	0.58±0.13b	1.72±0.61a	3.40±1.67a	5.11±1.09a	17.70±4.03b	33.04±1.60a	43.67±1.98a	41.20±2.31a
	2019	0.05±0.01	0.12±0.03a	0.12±0.01a	0.74±0.25b	1.64±0.12a	3.52±0.32a	3.75±0.72a	7.63±0.15a	7.58±2.07a	0.04±0.01	0.45±0.05a	0.25±0.06b	1.31±0.41b	6.68±2.57a	9.70±1.18b	13.81±1.77a	26.8±3.38a	19.87±3.84a
	2020	0.05±0.01	0.09±0.03b	0.22±0.07a	1.76±1.06a	2.06±0.11a	7.68±2.81a	5.86±1.84a	6.85±1.74a	6.93±2.08a	0.07±0.02	0.73±0.35a	1.43±0.34a	4.43±0.83b	9.80±2.93a	15.87±2.35b	24.88±2.44a	41.62±5.27a	41.83±6.17a
Petunidin-3-O-glucoside	2018	0.01±0.00	0.03±0.00b	0.34±0.16a	1.44±0.54a	1.01±0.10a	7.19±1.11a	4.12±0.70b	17.09±5.74a	6.08±1.09b	0.03±0.01	0.83±0.19a	0.08±0.01b	1.32±0.71a	0.25±0.06a	3.59±0.77a	1.06±0.12b	3.48±0.34a	1.15±0.05b
	2019	0.01±0.00	0.19±0.08a	0.09±0.02a	1.44±0.44a	1.64±0.25a	8.86±0.14a	8.81±0.52a	22.36±0.58a	11.69±2.23b	0.03±0.00	0.65±0.22a	0.03±0.00b	0.71±0.20a	0.48±0.70a	2.85±0.37a	0.34±0.06b	3.83±0.34a	0.58±0.17b
	2020	0.01±0.00	0.07±0.04a	0.27±0.23a	1.57±0.64a	2.28±0.74a	11.02±2.07a	7.03±0.82b	14.52±3.58a	11.39±4.67a	0.02±0.00	0.07±0.02a	0.07±0.03a	0.31±0.13a	0.20±0.05a	0.57±0.08a	0.36±0.06b	0.78±0.10a	1.44±0.51a
Peonidin-3-O-glucoside	2018	0.05±0.01	0.06±0.00b	2.80±0.25a	4.18±0.66b	9.58±1.60a	27.19±2.94a	12.91±1.62b	50.03±3.08a	21.91±5.38b	0.13±0.01	1.8±0.41b	20.91±8.82a	27.18±10.36b	54.21±13.21a	148.63±50.57b	330.6±20.93a	434.12±28.95a	466.6±39.61a
	2019	0.04±0.01	0.33±0.11b	0.80±0.15a	3.40±1.12b	23.88±2.86a	21.34±1.37b	56.75±11.05a	98.24±8.04b	192.43±57.31a	0.13±0.07	3.24±0.6a	3.10±1.17a	14.42±4.75b	70.41±25.56a	83.21±8.59b	147.72±19.09a	275.37±31.19a	259.9±65.97a
	2020	0.07±0.02	0.11±0.04b	1.50±0.20a	8.48±3.27b	27.01±5.18a	37.52±11.11b	93.91±27.74a	90.52±33.13b	178.70±30.80a	0.83±0.47	14.39±4.64a	19.48±4.95a	53.51±6.93b	110.06±30.04a	171.23±15.8b	239.12±37.04a	415.71±72.83b	590.57±39.77a
Malvidin-3-O-glucoside	2018	0.04±0.02	0.07±0.02b	2.40±0.87a	9.97±2.08a	7.60±0.95a	60.21±10.5a	27.9±7.16b	281.20±2.05a	63.4±22.14b	0.09±0.03	3.46±0.91a	0.81±0.25b	10.94±5.21a	2.35±0.50b	23.09±3.65a	9.13±1.39b	25.33±2.32a	9.92±0.43b
	2019	0.04±0.01	0.97±0.42a	0.69±0.24a	10.61±3.15b	19.07±2.38a	81.70±3.23b	97.66±1.76a	339.10±6.97a	210.45±40.21b	0.10±0.03	6.22±2.14a	0.19±0.05b	7.32±1.93a	3.88±5.24a	20.52±2.54a	3.55±0.56b	31.01±2.70a	7.98±2.63b
	2020	0.06±0.01	0.4±0.23a	2.43±1.31a	16.91±4.92a	19.85±5.69a	96.07±4.33a	80.71±13.19a	238.24±29.38a	195.69±48.14a	0.24±0.10	1.15±0.16a	1.08±0.45a	3.85±1.36a	2.51±0.54a	6.22±0.40a	5.08±0.95a	11.86±1.79b	23.72±5.70a
Delphinidin-3-O-(6-O-acetyl)glucoside	2018	Trace	0.01±0.00a	0.02±0.01a	0.07±0.03a	0.06±0.01a	0.59±0.13a	0.41±0.06a	1.70±1.30a	0.58±0.09a	0.02±0.01	0.21±0.06a	0.01±0.00b	0.07±0.03a	0.02±0.00b	0.19±0.05a	0.04±0.00b	0.13±0.02a	0.03±0.00b
	2019	Trace	0.02±0.01a	Trace	0.1±0.03a	0.06±0.01a	0.60±0.04a	0.62±0.15a	1.29±0.01a	0.50±0.08b	0.02±0.00	0.06±0.02a	0.01±0.00b	0.04±0.01a	0.03±0.05a	0.20±0.02a	0.01±0.00b	0.20±0.03a	0.02±0.00b
	2020	Trace	0.01±0.01a	0.02±0.01a	0.09±0.02a	0.19±0.07a	0.85±0.24a	0.42±0.07b	0.91±0.37a	0.53±0.31a	0.01±0.00	0.01±0.00a	0.01±0.00a	0.02±0.01a	0.01±0.00a	0.02±0.01a	0.01±0.00a	0.02±0.01a	0.05±0.03a
Cyanidin-3-O-(6-O-acetyl)glucoside	2018	Trace	0.01±0.00b	0.05±0.01a	0.12±0.03a	0.12±0.02a	0.82±0.12a	0.33±0.04b	1.38±0.92a	0.44±0.07a	0.01±0.00	0.14±0.04a	0.17±0.04a	0.43±0.19a	0.45±0.11a	2.33±0.48b	3.18±0.18a	5.73±0.29a	3.55±0.26b
	2019	Trace	0.01±0.00a	0.01±0.00a	0.12±0.04a	0.14±0.01a	0.64±0.08a	0.45±0.10a	1.04±0.03a	0.66±0.14b	0.01±0.00	0.07±0.00a	0.03±0.01b	0.21±0.06a	0.65±0.43a	1.43±0.14a	1.16±0.16a	3.17±0.33a	1.85±0.36b
	2020	0.01±0	0.01±0.00b	0.04±0.01a	0.2±0.09a	0.26±0.03a	1.00±0.28a	0.56±0.11a	0.77±0.17a	0.60±0.28a	0.01±0.00	0.05±0.02b	0.12±0.03a	0.38±0.06b	0.86±0.25a	1.35±0.25b	2.20±0.15a	4.05±0.67a	3.39±0.68a
Petunidin-3-O-(6-O-acetyl)glucoside	2018	Trace	0.01±0.00b	0.07±0.04a	0.25±0.09a	0.22±0.02a	1.6±0.30a	1.28±0.24a	4.98±2.16a	2.02±0.34a	0.02±0.01	0.52±0.14a	0.03±0.00b	0.39±0.17a	0.09±0.02b	1.05±0.22a	0.26±0.03b	0.84±0.10a	0.25±0.01b
	2019	Trace	0.05±0.02a	0.02±0.00b	0.3±0.08a	0.27±0.05a	1.77±0.08a	2.08±0.34a	4.34±0.08a	2.27±0.36b	Trace	0.27±0.09a	0.01±0.00b	0.25±0.06a	0.14±0.21a	0.95±0.10a	0.10±0.03b	1.07±0.07a	0.16±0.04b
	2020	Trace	0.03±0.02a	0.07±0.04a	0.32±0.11a	0.61±0.19a	2.36±0.57a	1.43±0.22a	3.38±0.96a	2.11±1.10a	0.01±0.00	0.02±0.00a	0.02±0.01a	0.08±0.03a	0.05±0.01a	0.14±0.03a	0.08±0.01b	0.18±0.03a	0.36±0.16a
Peonidin-3-O-(6-O-acetyl)glucoside	2018	0.02±0.01	0.04±0.01b	1.31±0.18a	1.57±0.32b	3.44±0.77a	7.64±0.29a	5.03±0.80b	13.62±1.41a	7.48±1.25b	0.03±0.00	0.58±0.11b	5.42±1.93a	7.75±3.38a	14.24±3.01a	39.29±4.60b	58.7±2.74a	76.33±2.92a	69.52±2.95b
	2019	0.02±0.01	0.24±0.1a	0.34±0.07a	1.97±0.52b	5.45±0.48a	7.94±0.51b	13.11±2.13a	22.17±1.40a	30.84±7.27a	0.04±0.01	0.89±0.16a	0.86±0.31a	4.97±1.43b	13.76±4.32a	22.69±2.24a	28.25±4.10a	50.82±5.16a	39.71±8.89a
	2020	0.04±0.02	0.06±0.02b	1.05±0.16a	2.68±0.86b	7.23±0.74a	9.80±1.84b	17.58±3.82a	17.01±3.88b	31.63±7.30a	0.17±0.08	2.1±0.79a	3.86±0.92a	12.82±1.71b	23.99±5.59a	34.31±3.58a	41.58±4.07a	64.27±11.79a	72.83±5.88a
Malvidin-3-O-(6-O-acetyl)glucoside	2018	0.04±0.01	0.11±0.03b	1.41±0.40a	4.84±1.02a	3.93±0.37a	15.27±1.12a	12.07±2.61a	76.31±2.92a	21.91±5.92b	0.06±0.02	3.76±0.78a	0.48±0.10b	7.59±2.44a	1.49±0.19b	13.74±1.75a	5.11±0.76b	12.84±1.01a	5.42±0.30b
	2019	Trace	1.48±0.81a	0.42±0.15a	6.42±1.22a	6.22±0.75a	26.51±0.96b	31.61±0.61a	91.23±2.11a	70.97±12.71a	0.08±0.01	5.59±1.84a	0.13±0.05b	5.57±1.07a	1.90±2.47a	12.07±1.04a	1.85±0.32b	14.05±1.21a	4.49±1.59b
	2020	Trace	0.58±0.33b	1.76±0.55a	6.60±1.74a	8.16±2.13a	29.69±3.85a	25.85±4.44a	72.83±7.96a	68.13±17.83a	Trace	0.5±0.12a	0.48±0.16a	2.05±0.49a	1.33±0.25a	2.95±0.08a	2.47±0.41a	6.18±1.19b	13.32±3.14a
Delphinidin-3-O-(6-O-p-caffeoyl)glucoside	2018	Trace	Trace	Trace	Trace	Trace	0.01±0.00a	0.01±0.00b	0.05±0.03a	0.01±0.00a	Trace	0.03±0.01a	Trace	0.01±0.00a	Trace	0.01±0.00a	Trace	Trace	Trace
	2019	Trace	Trace	Trace	Trace	Trace	0.03±0.00a	0.02±0.00b	0.11±0.01a	0.05±0.01b	0.03±0.00	0.01±0.00a	Trace	Trace	Trace	Trace	Trace	0.01±0.00a	Trace
	2020	Trace	Trace	Trace	0.01±0.00a	Trace	0.03±0.01a	0.01±0.00b	0.09±0.04a	0.05±0.02a	Trace	Trace	Trace	Trace	Trace	Trace	Trace	Trace	Trace
Cyanidin-3-O-(6-O-p-caffeoyl)glucoside	2018	Trace	Trace	Trace	0.01±0.00a	Trace	0.02±0.00a	0.01±0.00b	0.04±0.02a	0.02±0.00a	Trace	0.01±0.00a	Trace	Trace	Trace	0.01±0.00a	0.01±0.00b	0.06±0.01a	0.05±0.01a
	2019	Trace	Trace	Trace	0.01±0.00a	0.01±0.00a	0.05±0.01a	0.02±0.00b	0.07±0.01a	0.06±0.01a	Trace	Trace	Trace	Trace	0.01±0.02a	Trace	0.01±0.00a	0.09±0.01a	0.08±0.02a
	2020	Trace	Trace	0.01±0.00a	0.02±0.02a	0.01±0.00a	0.05±0.01a	0.03±0.01b	0.06±0.02a	0.05±0.02a	Trace	Trace	Trace	Trace	Trace	0.01±0.00b	0.02±0.00a	0.21±0.03a	0.20±0.02a
Petunidin-3-O-(6-O-p-caffeoyl)glucoside	2018	Trace	Trace	Trace	0.01±0.00a	Trace	0.02±0.00a	0.02±0.00b	0.08±0.02a	0.04±0.01b	Trace	0.07±0.02a	Trace	0.03±0.01a	0.01±0.00b	0.02±0.01a	Trace	0.01±0.00a	Trace
	2019	0.05±0.02	0.01±0.00a	Trace	0.01±0.00a	0.01±0.00a	0.06±0.00a	0.05±0.01b	0.16±0.01a	0.10±0.01b	Trace	0.01±0.00a	Trace	Trace	Trace	Trace	Trace	0.02±0.00a	0.01±0.00b
	2020	0.07±0.02	0.01±0.00a	Trace	0.02±0.01a	0.01±0.00b	0.06±0.01a	0.03±0.01b	0.15±0.04a	0.08±0.03a	0.12±0.02	Trace	Trace	Trace	Trace	Trace	Trace	0.01±0.00a	0.02±0.01a
Peonidin-3-O-(6-O-p-caffeoyl)glucoside	2018	Trace	0.01±0.00b	0.03±0.01a	0.06±0.00a	0.07±0.02a	0.27±0.01a	0.21±0.04a	0.87±0.05a	0.43±0.09b	Trace	0.07±0.02a	0.03±0.00b	0.11±0.02a	0.08±0.01a	0.27±0.03b	0.62±0.08a	2.73±0.54a	2.52±0.48a
	2019	Trace	0.01±0.00a	0.01±0.00a	0.05±0.02b	0.19±0.01a	0.44±0.05a	0.56±0.06a	2.00±0.23a	2.92±0.56a	0.01±0.00	0.04±0.01a	0.01±0.00b	0.05±0.01a	0.34±0.48a	0.20±0.01a	0.24±0.06a	2.84±0.39a	2.98±0.93a
	2020	Trace	0.01±0.00b	0.04±0.01a	0.17±0.09a	0.12±0.03a	0.50±0.10a	0.94±0.28a	1.78±0.55a	2.56±0.37a	Trace	0.02±0.00b	0.05±0.01a	0.10±0.03a	0.15±0.04a	0.37±0.08a	0.65±0.21a	5.73±0.70a	6.56±0.19a
Malvidin-3-O-(6-O-p-caffeoyl)glucoside	2018	Trace	0.01±0.00b	0.02±0.01a	0.14±0.01a	0.05±0.00b	0.42±0.04a	0.35±0.05a	2.09±0.19a	0.86±0.18b	0.01±0.01	0.53±0.12a	0.02±0.01b	0.42±0.11a	0.05±0.01b	0.29±0.08a	0.09±0.02b	0.48±0.12a	0.23±0.04b
	2019	Trace	0.05±0.02a	0.01±0.00b	0.12±0.03b	0.18±0.03a	0.83±0.05a	0.89±0.07a	4.31±0.35a	3.90±0.68a	Trace	0.18±0.07a	0.01±0.00b	0.10±0.00a	0.07±0.12a	0.14±0.00a	0.03±0.01b	0.69±0.06a	0.37±0.15b
	2020	Trace	0.03±0.01a	0.06±0.03a	0.34±0.10a	0.11±0.04b	0.84±0.11a	0.78±0.19a	4.28±0.69a	3.29±0.49a	Trace	0.01±0.00a	0.01±0.00b	0.02±0.00a	0.01±0.01a	0.06±0.02a	0.07±0.03a	0.51±0.15b	0.96±0.23a
Delphinidin-3-O-(6-O-p-coumaryl)glucoside	2018	Trace	0.03±0.00a	0.02±0.01a	0.19±0.04a	0.05±0.00b	0.69±0.15a	0.3±0.06b	1.80±1.03a	0.42±0.10a	0.01±0.00	0.07±0.02a	0.01±0.00b	0.07±0.02a	0.02±0.00b	0.17±0.06a	0.04±0.00b	0.12±0.02a	0.03±0.00b
	2019	0.02±0.00	0.06±0.03a	0.01±0.00b	0.15±0.02a	0.08±0.01b	0.81±0.02a	0.53±0.06b	1.81±0.04a	0.67±0.13b	0.01±0.00	0.05±0.01a	Trace	0.05±0.01a	0.04±0.06a	0.24±0.04a	0.02±0.00b	0.26±0.05a	0.03±0.01b
	2020	0.01±0.00	0.04±0.02a	0.03±0.03a	0.16±0.04a	0.14±0.03a	0.84±0.16a	0.36±0.05b	1.35±0.49a	0.84±0.31a	Trace	0.01±0.00a	0.01±0.00a	0.03±0.01a	0.02±0.00a	0.02±0.01a	0.02±0.00a	0.03±0.00a	0.09±0.06a
Cyanidin-3-O-(6-O-p-coumaryl)glucoside	2018	0.04±0.01	0.19±0.02a	0.15±0.03a	0.49±0.06a	0.29±0.05b	1.35±0.15a	0.45±0.07b	2.06±0.74a	0.54±0.12b	0.02±0.00	0.13±0.01b	0.19±0.01a	0.59±0.18a	0.40±0.10a	2.91±0.53a	3.81±0.19a	7.75±0.24a	4.28±0.32b
	2019	0.15±0.03	0.11±0.03a	0.05±0.00b	0.38±0.10a	0.35±0.04a	1.61±0.13a	0.75±0.10b	2.23±0.08a	1.33±0.32b	0.03±0.01	0.14±0.01a	0.05±0.00b	0.37±0.13a	1.24±1.11a	2.65±0.39a	1.75±0.23b	6.79±0.83a	3.21±0.57b
	2020	0.08±0.02	0.08±0.02a	0.12±0.05a	0.45±0.19a	0.45±0.02a	1.66±0.35a	0.93±0.13b	1.47±0.25a	1.36±0.34a	0.02±0.00	0.11±0.02b	0.31±0.08a	0.85±0.26a	1.37±0.45a	2.56±0.39a	3.28±0.24a	8.32±1.27a	6.20±0.87a
Petunidin-3-O-(6-O-p-coumaryl)glucoside	2018	0.01±0.00	0.05±0.00a	0.10±0.04a	0.82±0.14a	0.21±0.02b	1.79±0.20a	0.85±0.18b	4.78±1.18a	1.28±0.31b	0.01±0.00	0.26±0.05a	0.03±0.01b	0.35±0.12a	0.07±0.01b	0.73±0.17a	0.25±0.03b	0.69±0.07a	0.24±0.01b
	2019	0.02±0.00	0.23±0.07a	0.03±0.01b	0.50±0.11a	0.32±0.06a	2.06±0.05a	1.58±0.09b	5.27±0.23a	2.46±0.49b	0.02±0.00	0.28±0.08a	0.01±0.00b	0.25±0.07a	0.14±0.20a	0.85±0.14a	0.10±0.03b	1.05±0.09a	0.20±0.05b
	2020	0.02±0.00	0.15±0.07a	0.12±0.11a	0.49±0.12a	0.43±0.04a	2.15±0.40a	1.05±0.13b	4.28±0.94a	2.88±0.76a	0.01±0.00	0.05±0.01a	0.04±0.01a	0.13±0.02a	0.08±0.02b	0.15±0.02a	0.13±0.01a	0.24±0.04a	0.53±0.27a
Peonidin-3-O-(6-O-p-coumaryl)glucoside	2018	0.09±0.02	0.19±0.02b	1.47±0.23a	2.40±0.35a	3.15±0.66a	8.95±0.30a	4.78±0.94b	17.38±0.14a	6.63±1.45b	0.09±0.00	0.61±0.1b	3.70±1.10a	7.76±3.12a	8.77±1.92a	37.10±3.90b	51.62±0.70a	78.00±3.32a	56.21±2.70b
	2019	0.12±0.01	0.46±0.10a	0.38±0.06a	2.00±0.52b	5.45±0.73a	10.62±0.71a	13.87±2.14a	37.81±2.28a	45.98±11.95a	0.08±0.00	1.53±0.21a	0.81±0.18b	5.89±1.92a	17.46±11.89a	30.09±2.65a	29.22±3.46a	89.89±11.25a	57.81±12.71b
	2020	0.14±0.02	0.18±0.05b	0.96±0.09a	2.85±1.11b	5.93±0.76a	11.91±2.17b	22.27±3.55a	29.87±5.65b	52.78±1.06a	0.25±0.10	2.59±0.54b	4.89±1.28a	14.78±1.67a	25.69±7.69a	37.55±3.36a	45.38±5.83a	107.21±18.92a	100.88±11.15a
Malvidin-3-O-(6-O-p-coumaryl)glucoside	2018	0.12±0.04	0.16±0.01b	1.05±0.29a	7.24±0.90a	2.43±0.19b	15.89±1.03a	7.75±1.53b	67.93±4.52a	13.40±2.95b	0.11±0.04	2.28±0.45a	0.34±0.08b	5.86±1.71a	0.89±0.11b	9.26±1.04a	3.56±0.49b	9.55±0.99a	3.47±0.10b
	2019	0.12±0.02	2.21±0.71a	0.31±0.10b	4.99±1.01a	4.46±0.68a	22.40±0.50a	21.91±0.31a	96.39±2.18a	61.24±12.82b	0.07±0.01	5.26±1.35a	0.12±0.02b	4.81±0.98a	1.75±2.33a	10.32±1.42a	1.35±0.27b	12.59±0.80a	3.71±1.18b
	2020	0.11±0.00	1.47±0.71a	1.41±1.10a	6.85±1.51a	4.68±0.50a	24.80±2.63a	18.55±3.37a	85.40±5.17a	66.57±2.31b	0.15±0.03	0.82±0.16a	0.58±0.23a	2.20±0.36a	1.25±0.32b	2.52±0.18a	2.17±0.44a	5.36±1.06a	10.96±3.66a
Total anthocyanins	2018	0.48±0.13	1.19±0.08b	11.85±2.64a	36.25±6.46a	33.99±4.87a	161.49±15.08a	83.41±16.54b	563.65±25.19a	153.56±42.68b	0.73±0.14	16.41±3.63a	33.97±12.87a	74.74±29.6a	88.58±20.34a	301.95±66.73b	501.51±28.24a	703.24±41.06a	665.10±47.63a
	2019	0.70±0.05	6.73±2.54a	3.33±0.81a	34.23±8.87b	69.97±6.86a	197.48±7.37b	259.85±20.21a	752.7±18.17a	651.22±130.03a	0.74±0.08	25.18±6.4a	5.66±1.80b	46.54±12.93a	119.23±57.25a	199.49±20.73a	229.63±29.09a	522.32±57.52a	403.13±98.90a
	2020	0.69±0.09	3.39±1.49b	10.26±3.49a	50.76±15.57b	81.71±7.39a	247.53±30.72a	283.47±42.27a	582.12±62.26a	632.68±119.46a	1.94±0.80	22.65±6.76a	32.47±8.42a	95.68±12.45b	177.46±48.14a	276.10±24.49b	367.65±50.72a	672.56±113.65a	874.29±65.30a
* S=Skin, P=Pulp, C=Control, B=bagging. Values were reported as means ± SD. Different letters within a row indicated significant differences among treatments at the same stage on the basis of Duncan’s multiple range test at p<0.05 (n=6).

## Sheet: Supplementary Table 6
Supplementary Table 6 The concentrations of flavonols in the Kolor skin and pulp in five develomental stages from 2018 to 2020.
Compounds (mg/kg FW)	Year	E-L 33	E-L 35		E-L 36		E-L 37		E-L 38		E-L 33	E-L 35		E-L 36		E-L 37		E-L 38
		S-C*	S-C	S-B	S-C	S-B	S-C	S-B	S-C	S-B	P-C	P-C	P-B	P-C	P-B	P-C	P-B	P-C	P-B
Myricetin-3-O-galactoside	2018	0.2±0.02	0.21±0.01a	0.25±0.02a	0.28±0.02b	0.47±0.1a	0.99±0.09b	1.51±0.1a	2.14±0.15a	2.22±0.12a	0.38±0.02	0.44±0.05b	0.7±0.01a	0.72±0.18a	1±0.05a	2.31±0.41b	3.72±0.2a	6.98±0.21a	5.96±0.48b
	2019	Trace	0.01±0b	0.03±0.01a	0.11±0.04b	0.72±0.04a	0.74±0.03b	1.7±0.26a	3.34±0.17b	4.49±0.59a	Trace	0.04±0.02a	0.04±0.01a	0.14±0.04a	1.27±0.74a	1.29±0.14b	2.8±0.42a	18.44±0.69a	6.63±3.18b
	2020	0.35±0.16	Trace	0.06±0.01a	0.01±0b	0.8±0.04a	1.31±0.36b	2.77±0.6a	3.01±0.73b	5.56±0.7a	Trace	0.01±0b	0.25±0.05a	0.94±0.09b	2.88±0.11a	3.39±0.51a	3.15±1.12a	10.74±1.73a	6.72±1.64b
Myricetin-3-O-glucuronide	2018	0.21±0.02	0.24±0a	0.18±0.03b	0.22±0.01a	0.21±0.02a	0.26±0.01a	0.23±0.01b	0.58±0.1a	0.24±0b	0.38±0.02	0.44±0.05b	0.64±0.03a	0.56±0.08b	0.73±0.02a	0.81±0.02b	1.08±0.02a	1.28±0.02a	1.26±0.02a
	2019	0.03±0.01	0.03±0.01a	0.01±0b	0.03±0a	0.01±0b	0.19±0.01a	0.02±0b	1.12±0.1a	0.02±0.01b	0.01±0	Trace	Trace	Trace	Trace	Trace	Trace	0.05±0.01a	Trace
	2020	0.03±0.01	0.06±0.01a	0.02±0b	0.03±0.01a	0.03±0.01a	0.24±0.1a	0.06±0b	0.68±0.3a	0.07±0.01b	0.01±0	0.01±0a	0.01±0a	0.01±0a	0.01±0a	0.01±0a	0.01±0a	0.01±0a	0.01±0b
Myricetin-3-O-glucoside	2018	0.25±0.02	0.33±0.01a	0.22±0.03b	0.37±0.03a	0.31±0.03a	1.02±0.12b	1.36±0.07a	5.7±1.54a	2.29±0.17b	0.44±0.02	0.66±0.09a	0.66±0.04a	0.85±0.15a	0.79±0.02a	1.51±0.16a	1.31±0.04a	1.89±0.08a	1.49±0.03b
	2019	0.16±0.06	0.3±0.05a	0.06±0.01b	0.34±0.05a	0.16±0.05b	1.7±0.1a	1.21±0.12b	9.59±0.74a	3.27±0.78b	0.04±0	0.26±0.05a	0.06±0.04b	0.22±0.04a	0.2±0.23a	0.79±0.09a	0.13±0.02b	3.24±0.53a	0.08±0.04b
	2020	0.21±0.14	0.13±0.03a	0.05±0.04a	0.1±0.03b	0.42±0.07a	2.21±0.85a	1.44±0.06a	7.6±2.27a	4.96±1.53a	0.11±0.01	0.19±0.01a	0.27±0.06a	0.52±0.03b	1.49±0.19a	2.11±0.51a	0.54±0.08b	2.56±0.22a	1.54±0.27b
Laricitrin-3-O-glucoside	2018	0.11±0.01	0.12±0a	0.1±0.01a	0.12±0a	0.13±0.01a	0.22±0b	0.34±0.02a	0.96±0.05a	0.58±0.02b	0.22±0.01	0.26±0.03b	0.36±0.02a	0.34±0.06a	0.42±0.01a	0.54±0.03b	0.66±0.02a	0.87±0.02a	0.78±0.02b
	2019	Trace	0.01±0a	Trace	0.03±0.01b	0.08±0.02a	0.27±0.02b	0.36±0.01a	2.07±0.1a	1.35±0.26b	Trace	0.03±0.01a	0.01±0.01b	0.03±0.01a	0.05±0.06a	0.12±0.01a	0.04±0.01b	0.71±0.6a	0.14±0.08a
	2020	0.06±0.03	Trace	0.01±0.01a	Trace	0.09±0.02a	0.34±0.12a	0.4±0.04a	1.74±0.36a	1.53±0.24a	Trace	0.01±0a	0.02±0.01a	0.08±0b	0.22±0.02a	0.31±0.05a	0.1±0.02b	0.62±0.06a	0.39±0.07b
Syringetin-3-O-glucoside	2018	Trace	Trace	0.01±0a	0.02±0a	0.03±0.01a	0.12±0.01b	0.3±0.02a	1.33±0.24a	0.66±0.04b	0.01±0	0.02±0a	0.01±0b	0.06±0.02a	0.03±0a	0.15±0.02a	0.1±0.01b	0.33±0.04a	0.17±0.03b
	2019	Trace	0.01±0a	Trace	0.02±0b	0.05±0.01a	0.18±0.02b	0.25±0.02a	1.64±0.05a	1.35±0.27a	Trace	0.04±0.01a	0.01±0.01b	0.04±0.01a	0.06±0.09a	0.12±0.01a	0.05±0.01b	1.4±0.11a	0.26±0.18b
	2020	0.04±0.01	Trace	0.01±0a	Trace	0.06±0.01a	0.24±0.1a	0.34±0.05a	1.45±0.21a	1.49±0.15a	Trace	0.01±0a	0.02±0.01a	0.1±0.01b	0.21±0.03a	0.29±0.05a	0.1±0.03b	0.9±0.1a	0.56±0.1b
Quercetin-3-O-galactoside	2018	0.13±0.02	0.22±0.01a	0.13±0.02b	0.18±0.02a	0.16±0.02a	0.18±0.02a	0.15±0.01a	0.2±0.04a	0.15±0a	0.22±0.01	0.25±0.03b	0.36±0.02a	0.32±0.04b	0.41±0.01a	Trace	Trace	Trace	Trace
	2019	0.13±0.05	0.22±0.08a	0.02±0b	0.2±0.03a	0.02±0b	0.18±0.02a	0.01±0b	0.39±0.03a	0.01±0b	Trace	Trace	Trace	Trace	Trace	Trace	Trace	2.58±4.45a	Trace
	2020	0.06±0.04	0.12±0.02a	0.09±0.03a	0.17±0.04a	0.13±0.04a	0.2±0.11a	0.17±0.04a	0.13±0.08a	0.11±0.02a	Trace	Trace	Trace	Trace	Trace	0.01±0a	Trace	0.01±0a	Trace
Quercetin-3-O-glucuronide	2018	2.6±0.7	9.3±1.33a	3.94±1.31b	6.45±1.99a	4.48±0.66a	6.07±0.96a	3.81±0.52b	7.69±2.25a	3.39±0.12b	0.38±0.04	0.41±0.11a	0.42±0.03a	0.5±0.01a	0.53±0.04a	0.53±0.03b	0.65±0.02a	0.76±0.01a	0.75±0.01a
	2019	8.06±3.24	13.81±4.74a	2.19±0.08b	10.05±0.72a	1.89±0.11b	10.53±1.05a	1.33±0.19b	11.75±0.21a	1.79±0.4b	0.21±0.11	0.38±0.19a	0.06±0.01b	0.14±0.06a	0.04±0.02a	0.1±0.02a	0.04±0.02b	1.13±0.35a	0.1±0.04b
	2020	6.2±2.4	12.08±2.05a	8.96±2.88a	11.22±1.78a	7.88±1.57a	11.5±1.2a	10.4±0.57a	7.31±2.59a	8.49±1.08a	0.31±0.07	0.27±0.09a	0.37±0.09a	0.1±0.04a	0.19±0.1a	0.25±0.12a	0.3±0.05a	0.14±0.01a	0.08±0.01b
Quercetin-3-O-glucoside	2018	0.45±0.1	1.71±0.32a	0.47±0.11b	1.32±0.34a	0.57±0.09b	1.47±0.3a	0.77±0.03b	3.99±1.43a	0.89±0.01b	0.28±0.01	0.33±0.05b	0.44±0.02a	0.52±0.02b	0.64±0.01a	1.14±0.2b	1.63±0.1a	2.65±0.04a	2.39±0.16a
	2019	1.73±0.69	5.35±1.69a	0.34±0.01b	4.98±0.31a	0.52±0.01b	6.12±0.32a	0.72±0.11b	11.92±0.63a	1.87±0.5b	0.07±0.02	0.19±0.06a	0.08±0.02b	0.14±0.04b	0.64±0.19a	0.62±0.07b	1.38±0.24a	5.32±4.62a	2.91±1.33a
	2020	1.89±1.04	1.74±0.31a	1.49±0.38a	2.76±0.41a	1.81±0.33b	5.79±2.06a	2.94±0.16a	5.4±1.99a	3.12±0.63a	0.14±0.02	0.11±0.01b	0.39±0.05a	0.67±0.05b	1.52±0.07a	2.1±0.3a	2.83±0.83a	4.41±0.92a	2.74±0.8a
Quercetin-3-O-rutinosid	2018	0.14±0.05	0.13±0a	0.11±0.01a	0.18±0.02a	0.14±0.01b	0.5±0.06b	0.68±0.04a	1.59±1.21a	0.99±0.03a	0.22±0.01	0.28±0.04b	0.36±0.01a	0.36±0.06a	0.42±0.01a	0.6±0.03b	0.71±0.01a	1.05±0.04a	0.87±0.01b
	2019	0.01±0	0.03±0.01a	0.01±0b	0.08±0.02a	0.05±0.01a	0.49±0.03a	0.38±0.03b	1.2±0.06a	0.74±0.17b	0.01±0	0.04±0.01a	0.02±0.03a	0.04±0.01a	0.08±0.08a	0.28±0.02a	0.11±0.01b	1.73±0.06a	0.26±0.07b
	2020	0.11±0.05	0.01±0a	0.02±0.01a	0.02±0.01b	0.1±0.02a	0.57±0.13a	0.27±0.05b	1.19±0.41a	0.75±0.27a	0.01±0	0.01±0a	0.13±0.16a	0.13±0.02b	0.51±0.07a	0.78±0.16a	0.13±0.04b	1.27±0.13a	0.76±0.15b
Quercetin-3-O-rhamnoside	2018	0.13±0.02	0.38±0.07a	0.11±0.02b	0.31±0.05a	0.13±0.01b	0.29±0.04a	0.15±0.01b	0.62±0.25a	0.16±0b	0.22±0.01	0.25±0.03b	0.36±0.02a	0.32±0.05b	0.42±0.01a	0.46±0.01b	0.61±0.01a	0.74±0.01a	0.72±0.01a
	2019	0.09±0.04	1.19±0.35a	0.02±0b	0.96±0.05a	0.02±0b	1.26±0.08a	0.03±0b	1.92±0.06a	0.07±0.02b	Trace	0.03±0.01a	Trace	0.01±0.01a	Trace	0.01±0a	Trace	0.16±0.03a	0.01±0b
	2020	0.05±0.02	0.08±0.01a	0.06±0.02a	0.11±0.02a	0.06±0.01b	0.1±0.02a	0.08±0.01a	0.05±0.02a	0.06±0.01a	0.01±0	Trace	0.01±0a	Trace	Trace	0.01±0a	0.01±0a	Trace	Trace
Isorhamnetin-3-O-glucoside	2018	0.03±0	0.03±0a	0.03±0.01a	0.04±0a	0.06±0.01a	0.12±0.02a	0.16±0.02a	0.54±0.07a	0.32±0.02b	0.04±0	0.05±0.01b	0.1±0a	0.1±0.03b	0.2±0.02a	0.37±0.08b	0.63±0.03a	1.2±0.04a	1.17±0.13a
	2019	0.01±0	0.01±0a	0.01±0b	0.03±0.01b	0.06±0.01a	0.16±0.02a	0.15±0.03a	1.08±0.08a	0.94±0.26a	Trace	0.01±0b	0.02±0a	0.02±0.01b	0.25±0.11a	0.16±0.02b	0.41±0.07a	2.25±1.77a	1.55±0.85a
	2020	0.05±0.02	0.02±0a	0.02±0a	0.01±0b	0.09±0.02a	0.28±0.16a	0.38±0.1a	0.71±0.24a	1.07±0.2a	Trace	Trace	0.09±0.02a	0.21±0.05b	0.38±0.01a	0.53±0.04a	0.93±0.25a	1.75±0.31a	1.1±0.29a
Isorhamnetin-3-O-glucuronide	2018	0.02±0	0.03±0a	0.02±0a	0.03±0a	0.03±0a	0.03±0a	0.03±0a	0.06±0.01a	0.04±0b	Trace	Trace	Trace	Trace	Trace	Trace	Trace	Trace	Trace
	2019	0.01±0	0.01±0a	Trace	0.01±0a	Trace	0.02±0a	0.01±0b	0.08±0a	0.02±0b	Trace	Trace	Trace	Trace	Trace	Trace	Trace	0.02±0.04a	Trace
	2020	0.01±0	0.01±0a	0.01±0b	0.01±0a	0.01±0b	0.04±0.01a	0.02±0a	0.04±0.02a	0.04±0.02a	Trace	Trace	Trace	Trace	Trace	Trace	Trace	Trace	Trace
Kaempferol-3-O-galactoside	2018	Trace	0.12±0.01a	0.08±0.01b	0.1±0a	0.09±0.01a	0.1±0.01a	0.09±0.01a	0.11±0.01a	0.1±0a	Trace	Trace	Trace	Trace	Trace	Trace	Trace	Trace	Trace
	2019	0.01±0.01	0.01±0a	Trace	0.01±0a	Trace	0.01±0.01a	Trace	0.02±0a	Trace	Trace	Trace	Trace	Trace	Trace	Trace	Trace	1.01±1.75a	Trace
	2020	0.02±0	0.01±0a	0.01±0a	0.03±0.01a	0.01±0b	0.04±0.03a	0.01±0a	0.03±0.02a	0.01±0a	Trace	Trace	Trace	Trace	Trace	Trace	Trace	Trace	Trace
Kaempferol-3-O-glucoside	2018	0.35±0.03	0.42±0a	0.29±0.05b	0.37±0.01a	0.34±0.03a	0.38±0.02a	0.35±0.02a	0.44±0.04a	0.37±0.01b	0.63±0.03	0.72±0.08b	1.05±0.04a	0.92±0.14b	1.21±0.03a	1.34±0.04b	1.79±0.03a	2.13±0.04a	2.1±0.04a
	2019	0.07±0.02	0.28±0.11a	0.02±0b	0.18±0.02a	0.02±0b	0.22±0.01a	0.02±0b	0.53±0.02a	0.03±0.01b	0.01±0	0.02±0a	0.01±0a	0.01±0a	0.01±0a	0.02±0a	0.02±0a	0.55±0.66a	0.04±0.02a
	2020	0.1±0.04	0.03±0b	0.04±0.01a	0.02±0b	0.15±0.03a	0.5±0.28a	0.67±0.17a	1.25±0.43a	1.87±0.34a	0.01±0	0.01±0b	0.15±0.03a	0.36±0.08b	0.68±0.02a	0.93±0.08a	1.63±0.43a	3.13±0.58a	1.93±0.51a
Kaempferol-3-O-glucuronide	2018	0.35±0.03	0.45±0a	0.31±0.05b	0.42±0.03a	0.37±0.03a	0.4±0.03a	0.37±0.02a	0.44±0.03a	0.38±0.01b	0.63±0.03	0.73±0.09b	1.05±0.04a	0.93±0.13b	1.21±0.03a	1.34±0.04b	1.79±0.03a	2.13±0.04a	2.1±0.03a
	2019	0.1±0.04	0.37±0.14a	0.03±0b	0.18±0.03a	0.02±0b	0.21±0.02a	0.02±0b	0.33±0.01a	0.02±0.01b	0.01±0	0.01±0a	0.01±0b	0.01±0a	Trace	0.01±0a	Trace	0.03±0.03a	0.01±0a
	2020	0.79±0.47	0.09±0.02a	0.23±0.12a	0.91±0.28a	0.17±0.03b	1.96±0.62a	0.34±0.18b	1.62±0.6a	0.27±0.05b	0.02±0.01	0.02±0.01a	0.03±0a	0.01±0a	0.03±0.01a	0.04±0.01a	0.03±0a	0.04±0a	0.02±0b
Total-flavonols	2018	4.98±0.98	13.7±1.71a	6.26±1.67b	10.38±2.45a	7.52±0.97a	12.15±1.46a	10.32±0.76a	26.38±4.78a	12.76±0.42b	4.04±0.14	4.83±0.63b	6.51±0.28a	6.49±0.91b	8.03±0.03a	11.09±1b	14.67±0.46a	22.01±0.52a	19.77±0.87b
	2019	10.42±4.16	21.64±7.17a	2.75±0.1b	17.21±1.04a	3.64±0.15b	22.27±1.57a	6.2±0.76b	46.98±1.85a	15.98±3.13b	0.37±0.13	1.06±0.33a	0.33±0.12b	0.81±0.22a	2.61±1.5a	3.52±0.36b	4.97±0.75a	38.62±2.04a	11.98±5.78b
	2020	9.96±3.98	14.37±2.38a	11.08±3.28a	15.41±2.39a	11.8±2.04a	25.34±5.86a	20.29±1.39a	32.21±8.55a	29.41±5.01a	0.64±0.1	0.66±0.09b	1.74±0.14a	3.14±0.21b	8.13±0.55a	10.76±1.57a	9.75±2.74a	25.59±3.81a	15.87±3.75b
* S=Skin, P=Pulp, C=Control, B=bagging. Values were reported as means ± SD. Different letters within a row indicated significant differences among treatments at the same stage on the basis of Duncan’s multiple range test at p<0.05 (n=6).

## Sheet: Supplementary Table 7
Supplementary Table 7 The concentrations of flavan-3-ols in the Kolor skin and pulp in five develomental stages from 2018 to 2020.
Compounds (mg/kg FW)	Year	E-L 33	E-L 35		E-L 36		E-L 37		E-L 38		E-L 33	E-L 35		E-L 36		E-L 37		E-L 38
		S-C*	S-C	S-B	S-C	S-B	S-C	S-B	S-C	S-B	P-C	P-C	P-B	P-C	P-B	P-C	P-B	P-C	P-B
Catechin	2018	61.05±2.4	89.08±2.39a	43.21±7.28b	59.12±1.9a	49±2.93b	57.27±5.94a	41.63±2.37b	45.83±0.6a	42.66±1.54b	40.42±12.21	48.35±17.66a	62.39±27.37a	37.37±11.45a	38.22±10.91a	45.57±7.28a	48.53±2.57a	72.08±8.72a	61.43±4.18a
	2019	275.55±20.84	274.87±14.25a	157.92±5.31b	212.97±8.71a	146.55±11.77b	167.21±14.61a	141.97±9.23a	148.23±7.75a	132.64±22.13a	37.41±5.78	52.46±8.83b	86.62±7.76a	78.75±24.46a	61.09±9.81a	114.28±19.18a	97.29±12.72a	577.9±79.6a	135.98±35.82b
	2020	199.91±22.72	108.53±7.49a	87.52±16.36a	116.67±19.34a	109.17±16.16a	125.72±13.13a	112.24±9.98a	93.05±13.68b	128.35±10.78a	45.63±5.49	31.28±1.03b	60.92±12.6a	62.84±6.27a	57.54±6.15a	98.42±9.11a	98.02±2.54a	127.77±6.14a	136.04±29.02a
Epicatechin	2018	1313.47±73.9	1379.94±50.36a	1036.47±169.29b	1175.05±23.7a	1178.77±90.78a	1196.91±67.2a	1176.54±36.01a	996.65±25.51b	1175.91±25.81a	2946.5±309.66	3147.19±543.45a	2767.18±534.99a	1876.03±265.49a	1488.47±523.16a	706.08±140.72a	543.31±109.97a	276.51±19.78a	468.84±129.86a
	2019	11182.84±519.14	10447.48±247.12a	7601±177.22b	9066.22±539.03a	7330.83±584.78b	6877.14±76.4a	6112.7±670.41a	5958.88±857.48a	5307.84±905.07a	1295.03±232.2	655.56±14.26b	921.11±123.11a	606.93±287.41a	143.09±11.4b	296.28±112.78a	172±69.74a	866.56±300.99a	165.26±33.05b
	2020	7775.7±797.58	3950.91±253.01a	2505.78±396.67b	4071.92±477.45a	2671.03±291.15b	3435.47±349.98a	2817.17±160.58b	1727.6±359.29b	2962.38±157.76a	1962.35±279.54	762.08±123.83a	612.67±67.58a	364.16±145.78a	351.79±82.79a	319.72±59.36a	346.09±96.73a	254.74±21.12a	236.64±94.39a
Gallocatechin	2018	8.66±0.62	19.86±0.36a	5.75±1.17b	13.48±0.74a	6.52±0.2b	11.78±1.25a	6.45±0.08b	10.39±0.35a	6.09±0.17b	1.71±0.33	2.74±0.4a	0.72±0.04b	1.42±0.26a	0.67±0.06b	0.9±0.13a	0.48±0.04b	0.6±0.03a	0.41±0.01b
	2019	28.24±2.3	25.34±2.93a	10.31±0.31b	22.67±2.16a	7.33±0.68b	18.66±1.22a	6.58±0.99b	12.56±1.5a	4.39±0.85b	1.2±0.13	1.02±0.1a	0.42±0.07b	0.71±0.2a	0.15±0.01b	0.62±0.13a	0.23±0.02b	1.6±0.39a	0.23±0.06b
	2020	12.85±2.94	12.33±1.57a	5.25±1.52b	7.35±1.74a	9.07±1.1a	14.34±1.12a	8.72±0.83b	7.54±0.86a	8.79±0.67a	1.67±0.09	1.23±0.29a	0.72±0.04b	0.65±0.19a	0.55±0.18a	0.77±0.21a	0.4±0.19a	0.54±0.06a	0.31±0.11b
Epigallocatechin	2018	74.24±4.38	135.53±2.84a	56.25±11.47b	97.75±3.95a	63.18±2.16b	85.44±6.82a	66.84±2.25b	79.03±1.66a	63.23±0.42b	18.19±2.26	24.02±1.98a	11.49±1.07b	15.39±4.2a	9.93±1.22a	11.69±2.04a	6.07±1.1b	6.51±1.31a	4.82±0.8a
	2019	780.35±99.14	713.65±42.19a	410.21±21.15b	616.89±22.63a	293.09±10.18b	682.22±78.3a	250.13±12.76b	395.29±44.93a	245.45±49.65b	12.48±0.62	8.32±0.23a	5.24±0.16b	5.63±1.65a	1.74±0.17b	4.88±1.13a	2.53±0.79b	15.2±3.05a	2.66±0.61b
	2020	434.05±42.72	308.57±11.26a	143.77±16.63b	205.71±21.68a	187.12±18.63a	247.95±15.61a	165.15±11.92b	128.59±13.52b	190.69±1.45a	24.75±0.43	11.71±2.19a	7.41±0.47b	5.29±1.27a	5.15±0.98a	6.84±1.7a	5.32±2.11a	6.01±0.89a	4.23±1.37a
Epicatechin gallate	2018	73.77±1.36	102.34±5.52a	65.01±19.07b	83.66±7.03a	79.7±6.99a	71.17±11.29a	68.47±6.58a	52.03±1.43b	61.73±0.88a	135.1±42.13	164.03±66.09a	162.16±67.17a	76.89±32.95a	63.35±38.02a	35.56±11.3a	21.39±4.24a	12.97±3.23a	22.08±7.49a
	2019	24.87±2.67	15.97±3.63a	23.02±4.58a	17.97±1.62a	11.68±3.04b	10.61±0.79a	7.37±1.14b	5.66±1.01a	6.05±0.8a	32.05±9.24	8.83±2.88b	68.62±16.2a	20.57±17.08a	2.32±0.46a	9.51±5.34a	3.81±2.68a	17.67±10.74a	3.46±1.33a
	2020	23.05±6.57	19.69±2.63a	22.48±7.69a	19.53±8.66a	20.12±4.23a	15.39±1.56a	19.33±6.7a	3.64±1.05b	12.38±2.35a	25.33±7.21	9.23±2.01a	10.73±4.72a	4.45±2.89a	6.86±4.41a	4.37±0.81a	3.76±1.38a	2.85±0.23a	3.55±3.24a
Epigallocatechin gallate	2018	0.92±0.08	2.69±0.18a	0.71±0.24b	1.64±0.12a	0.85±0.05b	1.41±0.19a	0.84±0.01b	0.92±0.06a	0.73±0.02b	1.15±0.23	1.63±0.57a	0.96±0.6a	0.93±0.43a	0.58±0.24a	0.59±0.17a	0.26±0.06b	0.23±0.08a	0.32±0.09a
	2019	0.63±0.06	0.5±0.08a	0.44±0.05a	0.5±0.03a	0.28±0.03b	0.47±0.03a	0.27±0.03b	0.34±0.05a	0.2±0.04b	0.28±0.09	0.21±0.05a	0.41±0.23a	0.26±0.12a	0.06±0.01a	0.44±0.11a	0.1±0.04b	0.33±0.29a	0.08±0.03a
	2020	0.58±0.06	0.54±0.11a	0.31±0.1b	0.41±0.14a	0.44±0.01a	0.64±0.09a	0.37±0.03b	0.22±0.04b	0.5±0.04a	0.42±0.04	0.32±0.08a	0.24±0.03a	0.16±0.06a	0.32±0.23a	0.22±0.07a	0.15±0.03a	0.14±0.01a	0.12±0.04a
Total-free-flavan-3-ols	2018	43.48±4.95	81.76±1.77a	19.58±3.88b	52.5±10.07a	25.1±4.93b	35.87±6.45a	19.25±1.99b	24.62±2.9a	18.19±0.61b	38.26±22.64	47.95±8.93b	75.86±9.13a	62.98±26.6a	52.59±14.51a	8.55±5.34a	9.87±0.47a	11.14±0.94a	10.96±0.24a
	2019	131.74±20.36	76.75±5.52a	39.43±7.03b	59.71±20.3a	36.5±20.24a	32.8±5.78a	19.09±1.71b	19.2±1.78a	11.68±1.89b	9.53±1.46	12.23±3.99a	2.87±1.31b	40.62±7.72a	6.09±1.05b	14.98±1.51a	12.94±1.88a	15.94±0.55a	15.96±6.73a
	2020	78.12±18.05	20.44±11.71a	2.94±1.07a	3.61±1.53b	72.19±15.99a	35.57±3.25a	31.84±5.81a	19.19±1.48a	17.37±2.62a	15.62±3.56	3.48±0.58b	26.98±6.54a	7.7±0.96b	28.37±2.31a	8.27±1.39a	9.41±1.7a	14.30±2.66a	18.98±4.79a
Total-flavan-3-ols	2018	1532.09±81.14	1729.45±57.99a	1207.39±208.37b	1430.71±35.93a	1378.01±99.96a	1423.98±91.99a	1360.77±45.62a	1184.86±28.78b	1350.36±27.51a	3143.09±360.28	3387.96±614.35a	3004.9±628.24a	2008.03±300.52a	1601.21±573.43a	800.39±157.55a	620.04±117.16a	368.9±32.06a	557.91±139.8a
	2019	12292.48±553.81	11477.81±268.79a	8202.89±163.18b	9937.23±551.97a	7789.75±594.61b	7756.32±135.89a	6519.02±692.63b	6520.96±907.54a	5696.57±965.75a	1378.45±245.4	726.40±20.11b	1082.43±146.28a	712.84±329.49a	208.45±1.92a	426.02±136.99a	275.96±63.78a	1479.44±382.69a	307.66±68.91b
	2020	8446.12±859.4	4400.57±271.9a	2765.11±436.8b	4421.59±521.72a	2996.95±291.61b	3839.5±370.93a	3122.99±164.77b	1960.64±385.35b	3303.09±144.66a	2060.15±291.24	815.85±127.98a	692.7±82.12a	437.54±156.26a	422.21±81.55a	430.34±60.6a	453.75±98a	392.04±16.05a	380.88±117.05a
mDP	2018	15.08±0.65	10.97±0.24b	16.59±0.79a	13.26±0.57b	16.93±1.11a	14.09±0.69b	18.44±1.75a	14.29±0.18b	18.49±0.35a	29.82±4.06	31.92±15.1a	36.02±7.88a	21.74±1.83a	39.12±20.7a	35.59±4.37a	36.83±6.3a	20.61±1.11a	24.49±3.27a
	2019	28.91±1.55	27.47±1.05b	35.03±2.21a	30.67±0.96b	36.69±1.52a	31.53±3a	34.7±2.42a	31.05±2.68b	37.59±1.61a	28.76±2.95	16.15±2.63a	8.71±3.79b	11.47±4.7a	16.85±4.69a	10.37±0.64a	13.04±1.94a	14.52±2a	13.47±0.5a
	2020	28.13±2.04	26.05±0.14a	22.37±1.22b	26.54±1.87a	18.2±1.26b	20.59±0.16a	19.88±1.46a	16.13±1.27b	20.23±1.5a	31.77±2.42	26.09±1.56a	15.36±6.12b	15.5±0.97a	14.87±3.27a	13.67±2.75a	16.4±4.58a	11.1±1.52a	10.25±1.76a
* S=Skin, P=Pulp, C=Control, B=bagging. Values were reported as means ± SD. Different letters within a row indicated significant differences among treatments at the same stage on the basis of Duncan’s multiple range test at p<0.05 (n=6).
